# Supplementary material
Source: ML conference proceedings conference paper supplement (https://openreview.net/forum?id=XtnTav9T4g)
Supplement: supplementary_material [file attachment]

## Appendix of “HyperTime: Hyperparameter Optimization for Combating Temporal Distribution Shifts”

This appendix is organized into several sections that provide additional details and information related to the main paper:

- (1) Section A presents the details of the hyperparameter optimization algorithm in our method.
- (2) Section B includes a theoretical analysis in this paper.
- (3) Section C shows detailed information on the search space used in the paper.
- (4) Section D provides additional empirical evaluation results.
- (5) Section E provides detailed information on the datasets used in the paper.

### A DETAILS OF LEXIFLOW

LexiFlow is a randomized direct search based HPO algorithm, which is able to direct the search to the optimum based on lexicographic comparisons over pairs of configuration. It start from a initial hyperparameter configuration and gradually move to the optimal point by making comparisons with nearby configurations in the search space. More details about LexiFlow could be found in the paper [60].

---

#### Algorithm 1 LexiFlow

---

**Input:** Objectives  $L(\cdot)$ , tolerances  $K$  (optional).

```

1 Initialization: Initial configuration  $c_0$ ,  $t' = r = s = 0$ ,  $\delta = \delta_{init}$ ;
2 Obtain  $L(c_0)$ , and  $c^* \leftarrow c_0$ ,  $\mathcal{H} \leftarrow \{c_0\}$ ,  $Z_{\mathcal{H}} \leftarrow L(c_0)$ 
3 while  $t = 0, 1, \dots$  do
4   Sample  $\mathbf{u}$  uniformly from unit sphere  $\mathbb{S}$ 
5   if Update( $L(c_t + \mu\mathbf{u})$ ,  $L(c_t)$ ,  $Z_{\mathcal{H}}$ ) then  $c_{t+1} \leftarrow c_t + \mu\mathbf{u}$ ,  $t' \leftarrow t$ ;
6   else if Update( $L(c_t - \mu\mathbf{u})$ ,  $L(c_t)$ ,  $Z_{\mathcal{H}}$ ) then  $c_{t+1} \leftarrow c_t - \mu\mathbf{u}$ ,  $t' \leftarrow t$ ;
7   else  $c_{t+1} \leftarrow c_t$ ,  $s \leftarrow s + 1$ ;
8    $\mathcal{H} \leftarrow \mathcal{H} \cup \{c_{t+1}\}$ , and update  $Z_{\mathcal{H}}$  according to (9)
9   if  $s = 2^{d-1}$  then  $s \leftarrow 0$ ,  $\delta \leftarrow \delta\sqrt{(t' + 1)/(t + 1)}$ ;
10  if  $\delta < \delta_{lower}$  then
11    // Random Restart
12     $r \leftarrow r + 1$ ,  $c_{t+1} \leftarrow N(c_0, I)$ ,  $\delta \leftarrow \delta_{init} + r$ 
13  Procedure Update( $L(c')$ ,  $L(c)$ ,  $Z_{\mathcal{H}}$ ):
14    if  $L(c') \prec_{(Z_{\mathcal{H}})} L(c)$  Or ( $L(c') =_{(Z_{\mathcal{H}})} L(c)$  and  $L(c') \prec_l L(c)$ ) then
15      if  $L(c') \prec_{(Z_{\mathcal{H}})} L(c^*)$  Or ( $L(c') =_{(Z_{\mathcal{H}})} L(c^*)$  and  $L(c') \prec_l L(c^*)$ ) then
16         $c^* \leftarrow c'$ 
17      Return True
18  else
19    Return False
20 Output: A lexi-optimal configuration  $c^*$ 

```

---

<sup>1</sup>We adjust LexiFlow and make such changes: 1. Remove the optional input targets 2. Adjust tolerance from an absolute value to a relative value in percentage.

Given any two hyperparameter  $c'$  and  $c$ , the targeted lexicographic relations  $=_{(Z)}$ ,  $\prec_{(Z)}$  and  $\preceq_{(Z)}$  in Algorithm 1 are defined as:

$$L(c') =_{(Z)} L(c) \Leftrightarrow L^{(i)}(c') = L^{(i)}(c) \vee \quad (6)$$

$$(L^{(i)}(c') \leq z^{(i)} \wedge L^{(i)}(c) \leq z^{(i)}) \forall i \in [1, \dots, I],$$

$$L(c') \prec_{(Z)} L(c) \Leftrightarrow \exists i \in [I] : L^{(i)}(c') < L^{(i)}(c) \wedge \quad (7)$$

$$L^{(i)}(c) > z^{(i)} \wedge L_{i-1}(c) =_{(Z)} L_{i-1}(c'),$$

$$L(c') \preceq_{(Z)} L(c) \Leftrightarrow L(c') \prec_{(Z)} L(c) \vee L(c') =_{(Z)} L(c), \quad (8)$$

Where  $L_{i-1}(c)$  denotes the a vector with the first  $i - 1$  dimensions of  $L(c)$ , i.e.,  $L_{i-1}(c) = [L^{(1)}(c), \dots, L^{(i-1)}(c)]$ .  $\forall i \in [1, \dots, I]$ ,  $z^{(i)}$  are computed based on historically evaluated points  $\mathcal{H}$ .  $C_{\mathcal{H}}^0 = \mathcal{H}$ ,  $\forall i \in [1, \dots, I]$ :

$$z^{(i)} = L_{\mathcal{H}}^{(i)} * (1 + \kappa^{(i)}), C_{\mathcal{H}}^i = \{c \in C_{\mathcal{H}}^{i-1} | L^{(i)}(c) \leq z^{(i)}\}, \quad (9)$$

$$L_{\mathcal{H}}^{(i)} = \min_{c \in C_{\mathcal{H}}^{i-1}} L^{(i)}(c).$$

### B THEORETICAL ANALYSIS

- (1) We denote the  $k$ -th validation set as:  $\mathcal{D}_1, \mathcal{D}_2, \dots, \mathcal{D}_K$ .
- (2) We use  $d$  to denote the a data instance pair  $(\mathbf{x}, y)$  in a particular validation set  $\mathcal{D}$  in general.
- (3) We use  $l_c(d)$  to denote the loss of a particular ML model configured  $c$  on data instance  $d$ .
- (4) We use  $\mathbb{P}$  to denote the test data distribution.

**PROOF OF LEMMA 1.** We denote by  $\mathbb{P}$  the data distribution on which  $\mathcal{D}_{\text{test}}$  and  $\mathcal{D}_{\text{val}}$  is drawn from. Without loss of generality, we assume the loss function is Mean squared Error, i.e., for any validation set  $\mathcal{D}$ ,  $\text{Loss}(f_c, \mathcal{D}) = \frac{1}{|\mathcal{D}|} \sum_{d \in \mathcal{D}} l_c(d) = \frac{1}{|\mathcal{D}|} \sum_{(\mathbf{x}, y) \in \mathcal{D}} (f_c(\mathbf{x}) - y)^2$ . We further assume a bounded loss:  $\forall d \sim \mathbb{P}, l_c(d) < \beta$ . We have:

$$|\text{Loss}(f_c, \mathcal{D}_{\text{val}}) - \mathbb{E}[\text{Loss}(f_c, \mathcal{D}_{\text{test}})]| = \left| \frac{1}{|\mathcal{D}_{\text{val}}|} \sum_{i=1}^{|\mathcal{D}_{\text{val}}|} l_c(d_i) - \mathbb{E}_{d \sim \mathbb{P}}[l_c(d)] \right|, \quad (10)$$

where  $d_i$  is the  $i$ -th data instance in  $\mathcal{D}_{\text{val}}$  and thus  $d_i \sim \mathbb{P}$ . According to Hoeffding's inequality [22], we have:

$$\Pr(|\text{Loss}(f_c, \mathcal{D}_{\text{val}}) - \mathbb{E}[\text{Loss}(f_c, \mathcal{D}_{\text{test}})]| > \epsilon) = \quad (11)$$

$$\leq \frac{1}{|\mathcal{D}_{\text{val}}|} \sum_{i=1}^{|\mathcal{D}_{\text{val}}|} \mathbb{E}_{d \sim \mathbb{P}}[l_c(d)] \leq 2 \exp \frac{-2|\mathcal{D}_{\text{val}}|\epsilon^2}{\frac{1}{|\mathcal{D}_{\text{val}}|} \sum_{i=1}^{|\mathcal{D}_{\text{val}}|} \beta} = 2 \exp \frac{-2|\mathcal{D}_{\text{val}}|\epsilon^2}{\beta}.$$

By letting  $2 \exp \frac{-2|\mathcal{D}_{\text{val}}|\epsilon^2}{\beta} = \epsilon$ , we have with probability at least  $1 - \epsilon$ .

$$|\text{Loss}(f_c, \mathcal{D}_{\text{val}}) - \mathbb{E}[\text{Loss}(f_c, \mathcal{D}_{\text{test}})]| \leq \sqrt{\frac{\beta \ln(2/\epsilon)}{2|\mathcal{D}_{\text{val}}|}}.$$

Which completes the proof.  $\square$

**PROOF OF THEOREM 2. Proof sketch.** We consider the following two cases: (I)  $L_{k^*}(\hat{c}) \leq L_{avg}(\hat{c})$ ; (II)  $L_{k^*}(\hat{c}) > L_{avg}(\hat{c})$ .

It is easy to prove that under case (I), we have  $L_{k^*}(\hat{c}) \leq L_{avg}(\hat{c}) \leq (1 + \kappa)L_{avg}^* \leq (1 + \kappa)L_{avg}(c_{k^*}^*)$ , in which the last inequality is based on the definition of  $L_{avg}^*$ .

Under case (II), when  $\kappa \geq \frac{L_{avg}(c_{k^*}^*)}{L_{avg}^*} - 1$ , we have  $c_{k^*}^* \in C_*^{(0)}$ , i.e.,  $c_{k^*}^*$  is within the  $\kappa^{(0)}$ -tolerance from the best average validation loss, and thus

$$L_{k^*}(\hat{c}) \leq L_{worst}(\hat{c}) \leq L_{worst}(c_{k^*}^*),$$

in which the last inequality is based on the fact that  $c_{k^*}^*$  is within the  $\kappa^{(0)}$ -tolerance from the best average validation loss. We choose the best configuration according to the performance on  $L_{worst}$ , and thus  $L_{worst}(\hat{c}) < L_{worst}(\tilde{c})$  for all  $\tilde{c} \in C_*^{(0)}$ .

Combining the conclusions under both cases and high probability concentration of  $L_{k^*}(\hat{c})$  to  $\mathbb{E}[\text{Loss}(\hat{c}, \mathcal{D}_{test})]$  finishes the proof. We provide a more rigorous proof below.

**Case 1:**  $L_{k^*}(\hat{c}) \leq L_{avg}(\hat{c})$ .

In this case, we have,

$$L_{k^*}(\hat{c}) \leq L_{avg}(\hat{c}) \leq (1 + \kappa)L_{avg}^* \leq (1 + \kappa)L_{avg}(c_{k^*}^*). \quad (12)$$

**Case 2:**  $L_{k^*}(\hat{c}) > L_{avg}(\hat{c})$ :

When  $\kappa \geq \frac{L_{avg}(c_{k^*}^*)}{L_{avg}^*} - 1$ , we have  $c_{k^*}^* \in C_*^1$ , and thus

$$L_{k^*}(\hat{c}) \leq L_{worst}(\hat{c}) \leq L_{worst}(c_{k^*}^*), \quad (13)$$

in which the last inequality is based on the fact that when  $c_{k^*}^* \in C_*^1$ , we choose the best configuration according to the performance on  $L_{worst}$ , and thus  $L_{worst}(\hat{c}) < L_{worst}(\tilde{c})$  for all  $\tilde{c} \in C_*^1$ .

Combining **Case 1** and **Case 2**, we have,

$$L_{k^*}(\hat{c}) \leq \begin{cases} (1 + \kappa)L_{avg}(c_{k^*}^*), & \text{if } L_{k^*}(\hat{c}) \leq L_{avg}(\hat{c}) \\ L_{worst}(c_{k^*}^*), & \text{Otherwise} \end{cases} \quad (14)$$

According to the conclusion from Lemma 1, we have,

$$\mathbb{E}[\text{Loss}_{\mathcal{D}_{test}}(\hat{c})] \leq L_{k^*}(\hat{c}) + \sqrt{\frac{\beta \ln(1/\delta)}{2|\mathcal{D}_{val}|}}. \quad (15)$$

Combining Eq. (14) and Eq. (15) finishes the proof.  $\square$

## C SEARCH SPACE

### C.1 Search Space of gradient-boosting tree

**Table 7: Hyperparameters tuned in XGboost.**

| hyperparameter     | type  | range                           |
|--------------------|-------|---------------------------------|
| estimators number  | int   | [4, min(32768, train_datasize)] |
| max leaves         | int   | [4, min(32768, train_datasize)] |
| max depth          | int   | [0, 6, 12]                      |
| min child weight   | float | [0.001, 128]                    |
| learning rate      | float | [1/1024, 1.0]                   |
| subsample          | float | [0.1, 1.0]                      |
| colsample by tree  | float | [0.01, 1.0]                     |
| colsample by level | float | [0.01, 1.0]                     |
| reg alpha          | float | [1/1024, 1024]                  |
| reg lambda         | float | [1/1024, 1024]                  |

**Table 8: Hyperparameters tuned in LGBM.**

| hyperparameter    | type  | range                           |
|-------------------|-------|---------------------------------|
| estimators number | int   | [4, min(32768, train_datasize)] |
| leaves number     | int   | [4, min(32768, train_datasize)] |
| min child sample  | int   | [2, 129]                        |
| learning rate     | float | [1/1024, 1.0]                   |
| log_max_bin       | int   | [3, 11]                         |
| colsample by tree | float | [0.01, 1.0]                     |
| reg alpha         | float | [1/1024, 1024]                  |
| reg lambda        | float | [1/1024, 1024]                  |

### C.2 Search Space of neural network

We use the same neural network backbone as the Wild-Time [55] benchmark for different datasets based on its source code <https://github.com/huaxiuyao/Wild-Time>. We list the detailed search space used in different datasets in Table 9.

**Table 9: Hyperparameters tuned in neural networks.**

| Dataset   | Hyperparameter     | type  | Range               |
|-----------|--------------------|-------|---------------------|
| Yearbook  | Training iteration | int   | [3000, 5000]        |
|           | learning rate      | float | [1e-4, 1e-1]        |
|           | batch size         | int   | {32, 64, 128, 256}  |
|           | n_conv_channels    | int   | [16, 512]           |
|           | kernel_size        | int   | {2, 3, 4, 5}        |
|           | has_max_pool       | bool  | True or False       |
| FMoW-Time | Training iteration | int   | [3000, 6000]        |
|           | learning rate      | float | [1.5e-5, 3e-4]      |
|           | batch size         | int   | {32, 64, 128, 256}  |
|           | weight_decay       | float | [0, 0.03]           |
| MIMIC-IV  | Training iteration | int   | [3000, 5000]        |
|           | learning rate      | float | [5e-4, 5e-2]        |
|           | n_head             | int   | {2, 3, 4, 5}        |
|           | n_layer            | int   | {2, 3, 4, 5}        |
|           | hidden_size        | int   | {64, 128, 256, 512} |
| Huffpost  | Training iteration | int   | [6000, 8000]        |
|           | learning rate      | float | [1e-5, 1e-4]        |
|           | weight_decay       | float | [0.01, 0.03]        |
| arXiv     | Training iteration | int   | [6000, 8000]        |
|           | learning rate      | float | [1e-5, 1e-4]        |
|           | weight_decay       | float | [0.01, 0.03]        |

**Table 10: The number of validation folds and test folds for each dataset of the Wild-Time benchmark in our experiments.**

|          | Yearbook | FMoW-Time | MIMIC-IV | Huffpost | arXiv |
|----------|----------|-----------|----------|----------|-------|
| Val. num | 8        | 11        | 2        | 4        | 10    |
| Tes. num | 9        | 5         | 2        | 3        | 6     |

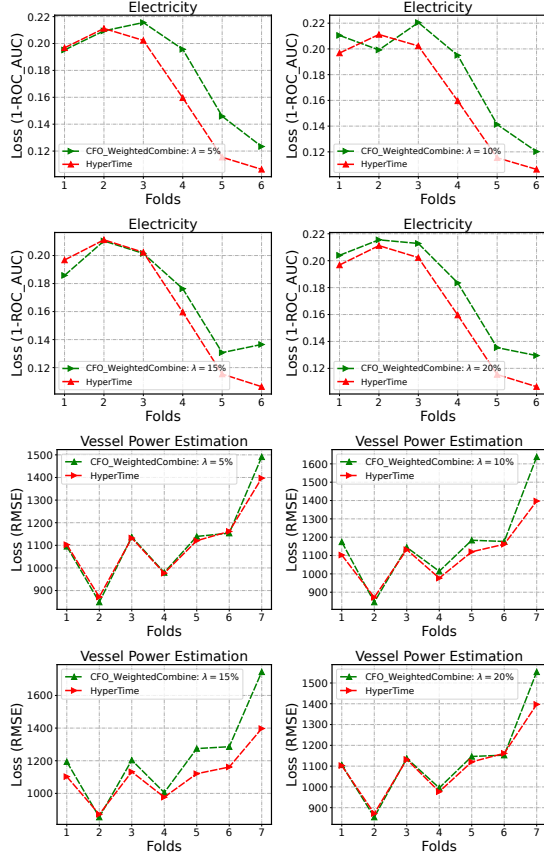**Figure 6: Per fold test loss (lower the better) for Hypertime and CFO\_WeightedCombine on Electricity and Vessel Power Estimation datasets with different weight settings. The results are averaged over five random seeds.**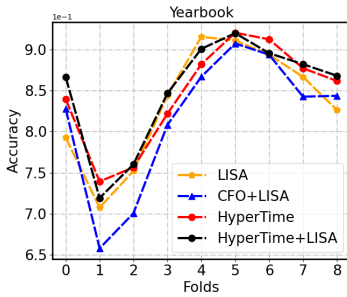**Figure 7: Per fold test accuracy for a state-of-the-art robust training method LISA [56], our method HyperTime, and the methods combining LISA and CFO and HyperTime respectively. The results are from the same set of experiments with that in Table 6. All the numbers are the higher the better.**

## D ADDITIONAL EMPIRICAL RESULTS

**Per fold performance in Table 6.** In Figure 7, we present the per-fold test performance for different methods in Table 6. Our observations indicate that the combination of HyperTime and Lisa achieves the best performance compared to other methods. It demonstrates that the combination of HyperTime and other non-HPO solutions overall further boost the model performance.

**Supplementary results of CFO\_WeightedCombine.** In this section, we conduct additional experiments to compare HyperTime with CFO\_WeightedCombine, which set the optimization objectives as a weighted combination of average validation loss and the worst fold validation loss in CFO. To represent the weights assigned to the worst fold validation loss, we use the symbol  $\lambda$ . Consequently, we set the weight for the average validation loss as  $1 - \lambda$ . We use four different  $\lambda$  settings for CFO\_WeightedCombine: 5%, 10%, 15%, and 20%. Figure 6 shows the per-fold test loss of these two methods. We observe that HyperTime outperforms CFO\_WeightedCombine under all four weight settings. This further demonstrates the importance of formulating the optimization of these two objectives as a lexicographic optimization problem.

## E DATASET DETAILS

### E.1 More details about Temperature prediction dataset

Temperature prediction is a synthetic data for urban climate research, which includes 75 years of urban climate condition information in specific areas. It has distribution shifts as mentioned in existing urban climate research works [28, 40]. Here we select 16 gridcells of data according to [65], with the latitude of 35.34, 36.28, 37.23, 38.17 and longitude of 115.0, 116.2, 117.5, 118.8. It includes ten features including near-surface humidity, eastward near-surface wind, precipitation, etc. In our experiment, we predict the urban daily maximum of average 2-m temperature which could be regarded as a regression task. More information about this data is available at [65].

### E.2 More information about fold splitting

To ensure fair and consistent comparisons, we use the same validation/test folds splitting setting as the Wild-Time benchmark. We list the number of training and test folds in Table 10. More information can be found in [55].
